# Supplementary material for: Sustainable development goals for people and planet
Source: Springer Nature journal article supplement (doi:10.1038/495305a), 2013-03-19
Supplement: 41586_2013_BF495305a_MOESM27_ESM.pdf [file 41586_2013_BF495305a_MOESM27_ESM.pdf]

# Supplementary information to: Sustainable development goals for people and planet

David Griggs, Mark Stafford-Smith, Owen Gaffney, Johan Rockström, Marcus C. Öhman, Priya Shyamsundar, Will Steffen, Gisbert Glaser, Norichika Kanie, Ian Noble.

Published in Nature 495, 305–307 (2013); <http://dx.doi.org/10.1038/495305a>.

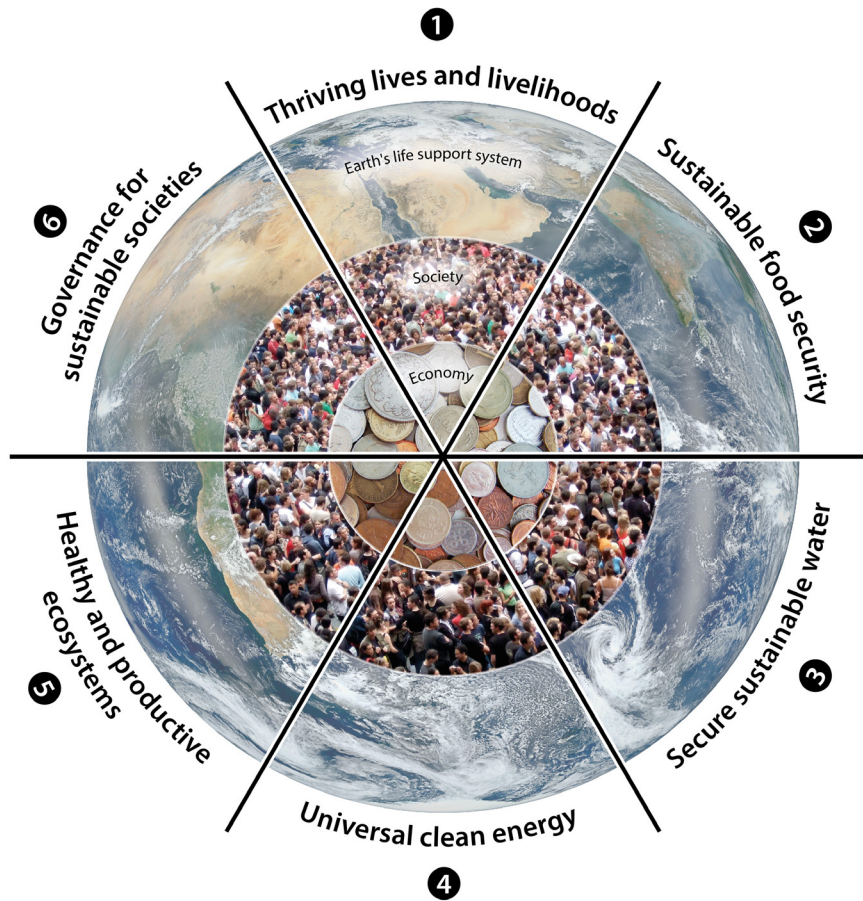

**Figure 1** | Six universal Sustainable Development Goals cutting across economic, social and environmental domains.

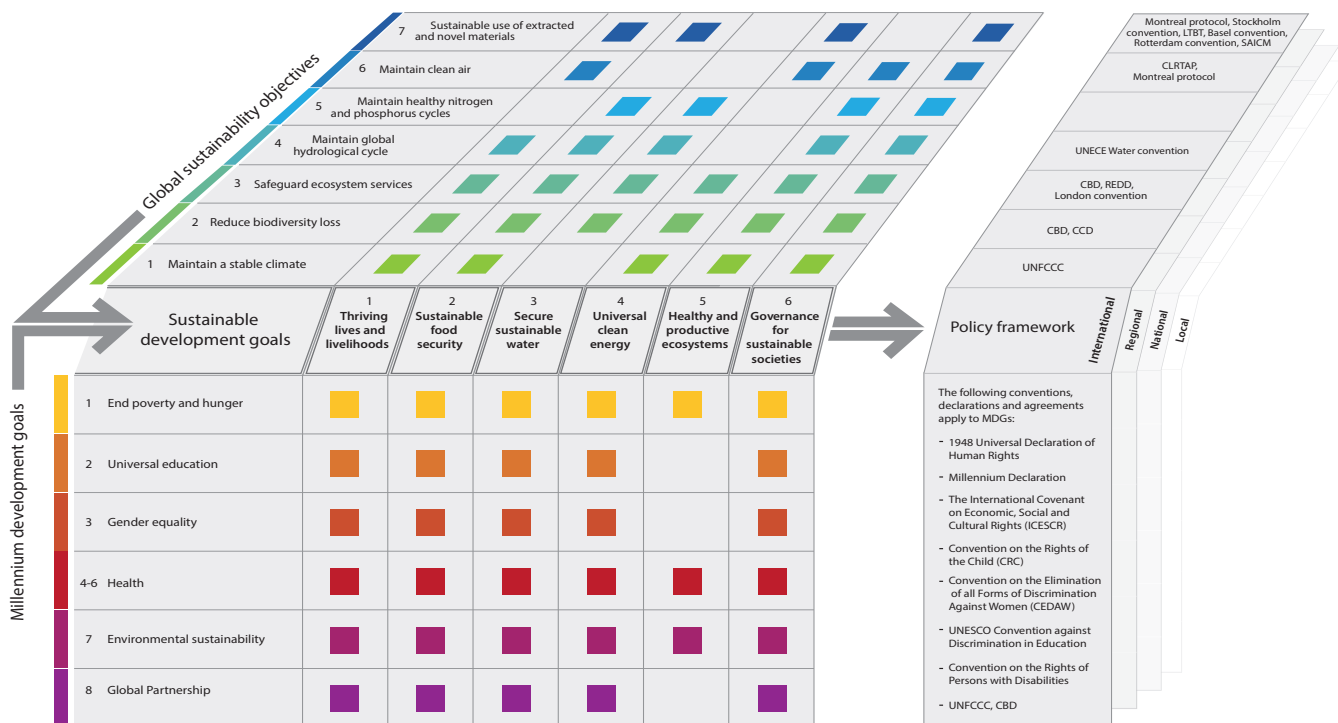

**Figure 2** | Six sustainable development goals (SDGs) for integrated delivery of Millennium Development Goals and planetary ‘must-haves’ (or Global Sustainability Objectives). Targets set within each SDG directly address social, economic and environmental dimensions. These goals, and the targets beneath, may be operationalized through a policy framework across levels from international to local, some of it already extant.
